# Supplementary material for: Early-life and health behaviour influences on lung function in early adulthood
Source: Eur Respir J. 2023 Mar 2;61(3):2001316. doi: 10.1183/13993003.01316-2020 (PMC9978163; doi:10.1183/13993003.01316-2020)
Supplement: Supplementary file 1 [file ERJ-01316-2020.Supplement.pdf]

# **Early-life and health behaviour influences on lung function in early-adulthood**

## **Online Data Supplement**

### **METHODS**

#### **Participants and data collection**

ALSPAC initially recruited 14,541 pregnant women resident in Avon, UK with expected delivery dates between April 1, 1991 and December 31. This initial number of pregnancies, known as core sample, included the mothers enrolled in the ALSPAC study and had either returned at least one questionnaire or attended a 'Children in Focus' research clinic by 19th July 1999. These initial pregnancies had a total of 14,676 fetuses, resulting in 14,062 live births and 13,988 children who were alive at age one-year. When the oldest children were approximately seven years of age, an attempt was made to bolster the initial sample with eligible cases who had failed to join the study originally. As a result, there are extra data available when considering variables collected from the age of seven years onwards. The number of new pregnancies, not in the core sample, known as phases II and III enrolments, is 706 (452 and 254 recruited during Phases II and III respectively), resulting in an additional 713 children being enrolled. The phases of enrolment are described in more detail in the cohort profile paper (1). Therefore, the total sample size for which the ALSPAC data collected after the age of seven years is therefore 15,247 pregnancies, resulting in 15,458 fetuses with 14,775 live births and 14,701 alive children at one-year of age.

We restricted our study (N = 7,545) to the core sample participants who have lung function measured at least once, after excluding quadruplets, triplets and one random child of each twin births. The study was approved by the ALSPAC Ethics and Law Committee and local research ethics committees. Informed consent for the use of data collected via questionnaires and clinics was obtained from participants following the recommendations of the ALSPAC Ethics and Law Committee at the time.

Data were collected from several sources: self-administered questionnaires sent to mothers at approximately annual intervals from 6 to 198 months (16½ years); annual physical examinations carried out during research clinics from age 7 to 13 years and at 15, 17 and 24 years. Study data were collected and managed using REDCap electronic data capture tools(2, 3) hosted at University of Bristol. The ALSPAC study website contains details of all data through a fully searchable data dictionary that is available on the following Web page:

<http://www.bris.ac.uk/alspac/researchers/data-access/data-dictionary/>

### **Investigated characteristics**

Factors were categorized according to their nature and timing: (1) demographic, maternal and child characteristics that do not change over time and/or were measured before birth, e.g. gas cooking, maternal asthma or allergy, family financial difficulties; (2) perinatal characteristics, e.g. birthweight, maternal smoking during pregnancy; (3) postnatal characteristics, e.g. maternal smoking during first year of age, air pollution exposure during first year of age; (4) early-childhood, e.g. exposure to second-hand smoking during age 1-8 years, air pollution exposure during age 1-7 years; lean and fat mass at age 9 years, current

asthma at age 7.5 years (5) adolescence characteristics, e.g. smoking status at age 14 years, pubertal age. Figure 1 shows an overview of investigated characteristics and a detailed description is provided in Table 1.

#### Lean mass and fat mass residuals

To adjust for differences in fat mass between females and males, and to adjust for height, the measures of fat mass and lean mass included in the analyses were calculated as the residuals from a linear regression of each on gender, height, and height squared. The standard deviation of fat mass residuals was 4.35 kg, approximately double that of lean mass (1.71 kg) residuals. We divided the fat mass residuals by two in subsequent analyses, so that regression coefficients for fat mass, and lean mass that were of similar size reflected associations of similar strength (4).

### Statistical analysis

#### Dealing with missing data:

To assess whether missing values of lung function at age 24 years (outcomes) can plausibly be imputed using information from earlier lung function measurements, linear correlation coefficients between SD-scores of lung function measured at different ages were examined (Table 2). A layout of missing data of investigated characteristics and lung function outcomes at ages 8, 15 and 24 years was depicted in Figure S1.

Among the study population ( $N = 7,545$ ), there were small amounts of missing data for all stages of factors (Figure S1). This varied from none, e.g. for pre-term delivery and maternal age at delivery, to 38%, for smoking status at age 14 years. The skin prick test (SPT) was

performed for only a selected random sub-sample. Therefore, the amount of its missing data was relatively high, 27%.

To increase power and minimize selection bias, multiple imputation by chained equations was performed to impute missing data among our study population (5). In our imputation models, we included all lung function measures at ages 8, 15 and 24 years, exposures, potential confounders, and additional variables that might be predictive of missingness or of the missing values themselves. These included all characteristics of interest as presented in Table 1, smoking status at ages 16, 18, 20, 22 and 23 years, current asthma at ages 9, 11, 13, 14 and 15, immunoglobulin-E blood test and maternal ever caesarean section delivery. We generated 20 imputed datasets using 10 cycles of regression switching (5). These datasets were then used for the main analyses. Since estimates of associations given by the regression models are derived to be normally distributed, we aggregated the findings across the imputed datasets using the Rubin's rules (6) and obtained 95% confidence intervals for characteristics' association by using the pooled means and pooled standard errors of estimated coefficients. The Rubin's rules produced average of individual coefficients and total average of between-imputation and within-imputation variances as the combined estimates of size of associations and their variances respectively.

Relative importance (RI) of influences on each lung function outcome were assessed using the Lindeman, Merenda, and Gold (LMG) method (7). The LMG analyses the explained variance,  $R^2$ , of a considered model and estimates the incremental  $R^2$ , defined as partial contribution to the total  $R^2$ , attributed to the characteristic of interest. The incremental  $R^2$

for each characteristic might be influenced by the order in which its variable was entered in a model, particularly when correlations among variables exist, i.e. it is larger when the variable entered first and lower when entered last. The LMG derives RI for each characteristic using its incremental  $R^2$  by averaging over all possible orderings among the set of characteristics in the same stage as the characteristic of interest. Thus, the relative importance of factors included in a model are normalized to sum up to its  $R^2$ . The procedures for calculating RI were implemented using the 'relaimpo' R package (8).

## **RESULTS:**

Table S1 reports characteristics of the study population using the observed and multiple imputed datasets. The summary statistics for most characteristics were similar in imputed and observed data due to their large proportions of observed data ( $\geq 90\%$ ) and the large size of study population ( $N = 7,545$ ). For characteristics with lower proportions of observed data, including smoking status at age 14 years (62%), current asthma at age 7.5 years (73%), skin prick test at age 7.5 years (73%), air pollution during 1-7 years of age (81%) and second-hand smoke exposure during age 1-8 years, the differences in summary statistics between observed and imputed data were small,  $-0.6\%$ ,  $-2.3\%$ ,  $-0.01\%$ ,  $0.06 \mu\text{g}/\text{m}^3$ ,  $1.7\%$  respectively. Lung function, age and height distributions at 24 years clinic were similar in observed and imputed data, see Table S2. The medians and interquartile ranges (IQRs) of height and age were identical in both observed and imputed datasets.

We have reported the crude associations of the investigated characteristics with lung function measurements, only adjusted by sex, age and height, in Tables S10 – S13.

## REFERENCES

1. Boyd A, Golding J, Macleod J, Lawlor DA, Fraser A, Henderson J, Molloy L, Ness A, Ring S, Davey Smith G. Cohort Profile: the 'children of the 90s'--the index offspring of the Avon Longitudinal Study of Parents and Children. *Int J Epidemiol* 2013; 42: 111-127.
2. Harris PA, Taylor R, Thielke R, Payne J, Gonzalez N, Conde JG. Research electronic data capture (REDCap)--a metadata-driven methodology and workflow process for providing translational research informatics support. *J Biomed Inform* 2009; 42: 377-381.
3. Harris PA, Taylor R, Minor BL, Elliott V, Fernandez M, O'Neal L, McLeod L, Delacqua G, Delacqua F, Kirby J, Duda SN, Consortium RE. The REDCap consortium: Building an international community of software platform partners. *J Biomed Inform* 2019; 95: 103208.
4. Granell R, Henderson AJ, Evans DM, Smith GD, Ness AR, Lewis S, Palmer TM, Sterne JA. Effects of BMI, fat mass, and lean mass on asthma in childhood: a Mendelian randomization study. *PLoS Med* 2014; 11: e1001669.
5. Azur MJ, Stuart EA, Frangakis C, Leaf PJ. Multiple imputation by chained equations: what is it and how does it work? *Int J Methods Psychiatr Res* 2011; 20: 40-49.
6. Rubin DB. Multiple imputation after 18+ years. *J Am Stat Assoc* 1996; 91: 473-489.
7. Sawrey WL. Introduction to Bivariate and Multivariate-Analysis - Lindeman,Rh, Merenda,Pf, Gold,Rz. *Contemp Psychol* 1981; 26: 374-374.
8. Gromping U. Relative importance for linear regression in R: The package relaimpo. *J Stat Softw* 2006; 17.

## TABLES

Table S1. Characteristics of study population using the observed and imputed datasets.

| Stage                                           | Factor                                                                 | Observed data |             | Imputed data (N = 7545) |
|-------------------------------------------------|------------------------------------------------------------------------|---------------|-------------|-------------------------|
|                                                 |                                                                        | N             | % or Median | % or Median             |
| Demographic, maternal and child characteristics | Overcrowding                                                           | 7214          | 20.57       | 20.8                    |
|                                                 | Gas cooking                                                            | 7222          | 53.96       | 53.95                   |
|                                                 | Rented housing                                                         | 7020          | 14.09       | 14.98                   |
|                                                 | Single Mother                                                          | 7356          | 18.28       | 18.54                   |
|                                                 | Low maternal education*                                                | 7225          | 57.49       | 57.99                   |
|                                                 | Maternal history of asthma or allergy                                  | 7110          | 47.33       | 47.27                   |
|                                                 | Family financial difficulties                                          | 7423          | 3.37        | 3.43                    |
|                                                 | Parity ( $\geq 1$ siblings)                                            | 7250          | 53.7        | 53.65                   |
| Perinatal characteristics                       | Maternal perinatal body mass index (Kg/m <sup>2</sup> ) †              | 6747          | 22.18       | 22.27                   |
|                                                 | Maternal age at delivery > 28 years (the median)                       | 7528          | 53.21       | 53.21                   |
|                                                 | Birthweight (Kg) †                                                     | 7437          | 3.44        | 3.44                    |
|                                                 | Pre-term delivery                                                      | 7528          | 5.37        | 5.38                    |
|                                                 | Caesarean section                                                      | 7357          | 10.51       | 10.5                    |
|                                                 | Maternal smoking during pregnancy                                      | 7146          | 20.86       | 21.05                   |
|                                                 | Maternal anxiety during pregnancy                                      | 6593          | 30.15       | 30.42                   |
|                                                 | Maternal gestational weight gain (Kg/week) †                           | 6906          | 0.43        | 0.42                    |
|                                                 | Air pollution exposure during pregnancy ( $\mu\text{g}/\text{m}^3$ ) † | 6983          | 32.72       | 32.7                    |
| Postnatal characteristics                       | Maternal smoking during first year of age                              | 6929          | 18.82       | 20.05                   |
|                                                 | Day care attendance during first year of age                           | 6879          | 6.72        | 6.63                    |
|                                                 | Family pet ownership during first year of age                          | 6938          | 69.07       | 69.27                   |
|                                                 | Maternal anxiety during first year of age                              | 6893          | 21.44       | 21.93                   |
|                                                 | Air pollution during first year of age ( $\mu\text{g}/\text{m}^3$ ) †  | 6932          | 31.38       | 31.38                   |
|                                                 | Breastfeeding during first 6 months                                    | 6978          | 81.76       | 81.23                   |
|                                                 | Early second-hand smoke exposure                                       | 7031          | 33.15       | 34.25                   |
| Early-Childhood characteristics                 | Second-hand smoke exposure during age 1-8 y                            | 6333          | 62.92       | 61.14                   |
|                                                 | Air pollution during 1-7 years of age ( $\mu\text{g}/\text{m}^3$ ) †   | 6140          | 73.14       | 73.07                   |
|                                                 | Lean mass at age 9 years (kg) †                                        | 5707          | -0.12       | -0.1                    |
|                                                 | Fat mass at age 9 years (kg/2) †                                       | 5707          | -0.47       | -0.37                   |
|                                                 | Current asthma at 7.5 years                                            | 5533          | 14.19       | 16.52                   |
|                                                 | Skin Prick Test at 7.5 years                                           | 5522          | 21.06       | 21.09                   |
| Adoles.                                         | Smoking status at 14 years                                             | 4679          | 24.96       | 25.68                   |
|                                                 | Age at peak height velocity in puberty (years) †                       | 7240          | 12.48       | 12.48                   |
|                                                 | Peak height velocity in puberty (cm/year) †                            | 7240          | 8.88        | 8.89                    |

Abbreviations: Adoles. = adolescence; Kg = kilogram; m = metre;  $\mu\text{g}$  = microgram; cm = centimetre.

\*Educated to the General Certificate of Education level (school-leaving certificate) or lower, see **Error! Reference source not found.**

†Continuous variables where medians were calculated.

Table S2. Comparisons of the characteristics of study population with the original ALSPAC population.

| Stage                                              | Factor                                                         | Study population<br>(N = 7,545) |                | Original ALSPAC<br>population (N= 13,798) |                |
|----------------------------------------------------|----------------------------------------------------------------|---------------------------------|----------------|-------------------------------------------|----------------|
|                                                    |                                                                | N                               | % or<br>Median | N                                         | % or<br>Median |
| Demographic, maternal and<br>child characteristics | Overcrowding                                                   | 7214                            | 20.57          | 12645                                     | 27.01          |
|                                                    | Gas cooking                                                    | 7222                            | 53.96          | 12731                                     | 52.63          |
|                                                    | Rented housing                                                 | 7020                            | 14.09          | 12202                                     | 22.68          |
|                                                    | Single Mother                                                  | 7356                            | 18.28          | 12980                                     | 24.38          |
|                                                    | Low maternal education*                                        | 7225                            | 57.49          | 12261                                     | 64.62          |
|                                                    | Maternal history of asthma or allergy                          | 7110                            | 47.33          | 12047                                     | 45.56          |
|                                                    | Family financial difficulties                                  | 7423                            | 3.37           | 12807                                     | 5.36           |
|                                                    | Parity (>= 1 siblings)                                         | 7250                            | 53.7           | 12765                                     | 55.22          |
| Perinatal<br>characteristics                       | Maternal perinatal body mass index (Kg/m <sup>2</sup> ) †      | 6747                            | 22.18          | 11374                                     | 22.18          |
|                                                    | Maternal age at delivery > 28 years (the median)               | 7528                            | 53.21          | 13798                                     | 45.14          |
|                                                    | Birthweight (Kg) †                                             | 7437                            | 3.44           | 13622                                     | 3.42           |
|                                                    | Pre-term delivery                                              | 7528                            | 5.37           | 13798                                     | 5.55           |
|                                                    | Caesarean section                                              | 7357                            | 10.51          | 8116                                      | 17.58          |
|                                                    | Maternal smoking during pregnancy                              | 7146                            | 20.86          | 12171                                     | 29.52          |
|                                                    | Maternal anxiety during pregnancy                              | 6593                            | 30.15          | 11120                                     | 34.07          |
|                                                    | Maternal gestational weight gain (Kg/week) †                   | 6906                            | 0.43           | 12438                                     | 0.42           |
|                                                    | Air pollution exposure during pregnancy (µg/m <sup>3</sup> ) † | 6983                            | 32.72          | 12638                                     | 32.67          |
| Postnatal<br>characteristics                       | Maternal smoking during first year of age                      | 6929                            | 18.82          | 11073                                     | 24.2           |
|                                                    | Day care attendance during first year of age                   | 6879                            | 6.72           | 10825                                     | 6              |
|                                                    | Family pet ownership during first year of age                  | 6938                            | 69.07          | 10941                                     | 69.42          |
|                                                    | Maternal anxiety during first year of age                      | 6893                            | 21.44          | 11023                                     | 22.42          |
|                                                    | Air pollution during first year of age (µg/m <sup>3</sup> ) †  | 6932                            | 31.38          | 12493                                     | 31.36          |
|                                                    | Breastfeeding during first 6 months                            | 6978                            | 81.76          | 11196                                     | 75.8           |
|                                                    | Early second-hand smoke exposure                               | 7031                            | 33.15          | 11328                                     | 38.06          |
| Early-Childhood<br>characteristics                 | Second-hand smoke exposure during age 1-8 y                    | 6333                            | 62.92          | 9804                                      | 72.23          |
|                                                    | Air pollution during 1-7 years of age (µg/m <sup>3</sup> ) †   | 6140                            | 73.14          | 10896                                     | 73.12          |
|                                                    | Lean mass at age 9 years (kg) †                                | 5707                            | -0.12          | 6339                                      | -0.11          |
|                                                    | Fat mass at age 9 years (kg/2) †                               | 5707                            | -0.47          | 6339                                      | -0.46          |
|                                                    | Current asthma at 7.5 years                                    | 5533                            | 14.19          | 7218                                      | 14.13          |
|                                                    | Skin Prick Test at 7.5 years                                   | 5522                            | 21.06          | 6438                                      | 20.69          |
| Adoles.                                            | Smoking status at 14 years                                     | 4679                            | 24.96          | 5586                                      | 25.67          |
|                                                    | Age at peak height velocity in puberty (years) †               | 7240                            | 12.48          | 9032                                      | 12.5           |
|                                                    | Peak height velocity in puberty (cm/year) †                    | 7240                            | 8.88           | 9032                                      | 8.91           |

Considered ALSPAC population = Singleton and one twin birth alive at age 1 year of the Avon Longitudinal Study of Parents and Children.

Abbreviations: Adoles. = adolescence; Kg = kilogram; m = metre; µg = microgram; cm = centimetre.

\*Educated to the General Certificate of Education level (school-leaving certificate) or lower, see **Error! Reference source not found..**

†Continuous variables where medians were calculated.

Table S3. Comparisons of the characteristics of participants in the study population with and without the lung function measurements at age 24 years.

| Stage                                              | Factor                                                         | With Lung function<br>measurements at age 24<br>years (N= 2,800) |                | Without lung function<br>measurements at age 24<br>years (N= 4,745) |                |
|----------------------------------------------------|----------------------------------------------------------------|------------------------------------------------------------------|----------------|---------------------------------------------------------------------|----------------|
|                                                    |                                                                | N                                                                | % or<br>Median | N                                                                   | % or<br>Median |
| Demographic, maternal and<br>child characteristics | Overcrowding                                                   | 2692                                                             | 17.27          | 4522                                                                | 22.53          |
|                                                    | Gas cooking                                                    | 2690                                                             | 54.68          | 4532                                                                | 53.53          |
|                                                    | Rented housing                                                 | 2624                                                             | 10.02          | 4396                                                                | 16.52          |
|                                                    | Single Mother                                                  | 2745                                                             | 15.63          | 4611                                                                | 19.87          |
|                                                    | Low maternal education*                                        | 2711                                                             | 50.02          | 4514                                                                | 61.98          |
|                                                    | Maternal history of asthma or allergy                          | 2660                                                             | 49.32          | 4450                                                                | 46.13          |
|                                                    | Family financial difficulties                                  | 2759                                                             | 2.79           | 4664                                                                | 3.71           |
|                                                    | Parity (>= 1 siblings)                                         | 2710                                                             | 53.1           | 4540                                                                | 54.05          |
| Perinatal<br>characteristics                       | Maternal perinatal body mass index (Kg/m <sup>2</sup> ) †      | 2543                                                             | 21.97          | 4204                                                                | 22.36          |
|                                                    | Maternal age at delivery > 28 years (the median)               | 2794                                                             | 58.2           | 4734                                                                | 50.27          |
|                                                    | Birthweight (Kg) †                                             | 2758                                                             | 3.43           | 4679                                                                | 3.45           |
|                                                    | Pre-term delivery                                              | 2794                                                             | 5.05           | 4734                                                                | 5.56           |
|                                                    | Caesarean section                                              | 2740                                                             | 10.88          | 4617                                                                | 10.29          |
|                                                    | Maternal smoking during pregnancy                              | 2666                                                             | 16.69          | 4480                                                                | 23.35          |
|                                                    | Maternal anxiety during pregnancy                              | 2465                                                             | 28.72          | 4128                                                                | 31.01          |
|                                                    | Maternal gestational weight gain (Kg/week) †                   | 2558                                                             | 0.43           | 4348                                                                | 0.42           |
|                                                    | Air pollution exposure during pregnancy (µg/m <sup>3</sup> ) † | 2591                                                             | 32.76          | 4392                                                                | 32.7           |
| Postnatal<br>characteristics                       | Maternal smoking during first year of age                      | 2599                                                             | 15.04          | 4330                                                                | 21.09          |
|                                                    | Day care attendance during first year of age                   | 2585                                                             | 7.58           | 4294                                                                | 6.19           |
|                                                    | Family pet ownership during first year of age                  | 2605                                                             | 68.25          | 4333                                                                | 69.56          |
|                                                    | Maternal anxiety during first year of age                      | 2587                                                             | 20.6           | 4306                                                                | 21.95          |
|                                                    | Air pollution during first year of age (µg/m <sup>3</sup> ) †  | 2561                                                             | 31.41          | 4371                                                                | 31.35          |
|                                                    | Breastfeeding during first 6 months                            | 2625                                                             | 85.56          | 4353                                                                | 79.46          |
|                                                    | Early second-hand smoke exposure                               | 2637                                                             | 28.97          | 4394                                                                | 35.66          |
| Early-Childhood<br>characteristics                 | Second-hand smoke exposure during age 1-8 y                    | 2378                                                             | 55.38          | 3955                                                                | 67.46          |
|                                                    | Air pollution during 1-7 years of age (µg/m <sup>3</sup> ) †   | 2219                                                             | 73.09          | 3921                                                                | 73.16          |
|                                                    | Lean mass at age 9 years (kg) †                                | 2132                                                             | -0.14          | 3575                                                                | -0.11          |
|                                                    | Fat mass at age 9 years (kg/2) †                               | 2132                                                             | -0.5           | 3575                                                                | -0.46          |
|                                                    | Current asthma at 7.5 years                                    | 2119                                                             | 13.17          | 3414                                                                | 14.82          |
|                                                    | Skin Prick Test at 7.5 years                                   | 2068                                                             | 20.94          | 3454                                                                | 21.13          |
| Adoles.                                            | Smoking status at 14 years                                     | 2128                                                             | 23.03          | 2551                                                                | 26.58          |
|                                                    | Age at peak height velocity in puberty (years) †               | 2693                                                             | 12.24          | 4547                                                                | 12.69          |
|                                                    | Peak height velocity in puberty (cm/year) †                    | 2693                                                             | 8.6            | 4547                                                                | 9.06           |

Abbreviations: Adoles. = adolescence; Kg = kilogram; m = metre; µg = microgram; cm = centimetre.

\*Educated to the General Certificate of Education level (school-leaving certificate) or lower, see **Error! Reference source not found..**

†Continuous variables where medians were calculated.

Table S4. Summary statistics of lung function outcomes at age 24 years for the study population using the observed and imputed datasets.

| Variable                                                     | Observed data |                     | Imputed data (N = 7545) |
|--------------------------------------------------------------|---------------|---------------------|-------------------------|
|                                                              | N             | Median (IQR)        | Median (IQR)            |
| Age (years)                                                  | 3391          | 24.4 (23.9 to 25.1) | 24.5 (23.9 to 25.1)     |
| Height at lung function clinic (metres)                      | 3371          | 1.7 (1.6 to 1.8)    | 1.7 (1.6 to 1.8)        |
| Forced vital capacity, FVC (L)                               | 2800          | 4.3 (3.7 to 5.2)    | 4.6 (3.9 to 5.5)        |
| Forced expiratory volume in one second, FEV <sub>1</sub> (L) | 2800          | 3.7 (3.2 to 4.4)    | 3.9 (3.3 to 4.6)        |
| FEV <sub>1</sub> /FVC (%)                                    | 2800          | 85.9 (82.0 to 89.5) | 85.4 (81.0 to 89.4)     |
| Forced expiratory flow, midexpiratory phase (L/s)            | 2800          | 4.1 (3.4 to 4.8)    | 4.2 (3.5 to 5.0)        |

Abbreviations: IQR= interquartile range ; L=litre ; s=second

Table S5. Pairwise linear correlation coefficients between SD scores (adjusted for sex, age and height) of lung function measurements at different timepoints.

|          | FVC      |          | FEV <sub>1</sub> |          | FEF <sub>25-75</sub> |          |
|----------|----------|----------|------------------|----------|----------------------|----------|
|          | 15 years | 24 years | 15 years         | 24 years | 15 years             | 24 years |
| 8 years  | 0.399    | 0.504    | 0.372            | 0.508    | 0.424                | 0.513    |
| 15 years |          | 0.475    |                  | 0.455    |                      | 0.484    |

Table S6. Adjusted association and relative importance of early-life characteristics with SD scores (adjusted for sex, age and height) of FVC measurements (non-imputed) at age 24 years (N=2800).

| Stage                                           | Factor                                                       | Adjusted* difference in SD scores of FVC (95% CI) | P-value             | Inc. R <sup>2</sup> (%) | RI(%) | Retained R <sup>2</sup> |
|-------------------------------------------------|--------------------------------------------------------------|---------------------------------------------------|---------------------|-------------------------|-------|-------------------------|
| Demographic, maternal and child characteristics | Overcrowding                                                 | -0.084 (-0.191 to 0.023)                          | 0.126               |                         | 0.078 |                         |
|                                                 | Gas cooking                                                  | 0.016 (-0.060 to 0.091)                           | 0.683               |                         | 0.011 |                         |
|                                                 | Rented housing                                               | -0.080 (-0.225 to 0.065)                          | 0.280               |                         | 0.073 |                         |
|                                                 | Single Mother                                                | 0.077 (-0.035 to 0.189)                           | 0.178               | 0.64                    | 0.031 | 0.40                    |
|                                                 | Low maternal education                                       | -0.004 (-0.080 to 0.073)                          | 0.921               |                         | 0.004 |                         |
|                                                 | Maternal history of asthma or allergy                        | 0.029 (-0.047 to 0.106)                           | 0.448               |                         | 0.020 |                         |
|                                                 | Family financial difficulties                                | -0.098 (-0.329 to 0.132)                          | 0.404               |                         | 0.028 |                         |
|                                                 | Parity (>= 1 siblings)                                       | 0.139 (0.062 to 0.217)                            | 4×10 <sup>-4</sup>  |                         | 0.398 |                         |
| Perinatal characteristics                       | Maternal perinatal body mass index (Kg/m <sup>2</sup> )      | 0.017 (0.006 to 0.028)                            | 0.003               |                         | 0.413 |                         |
|                                                 | Maternal age at delivery > 28 years (the median)             | 0.086 (0.008 to 0.164)                            | 0.030               |                         | 0.141 |                         |
|                                                 | Birthweight (Kg)                                             | 0.163 (0.080 to 0.247)                            | 1×10 <sup>-4</sup>  |                         | 0.561 |                         |
|                                                 | Pre-term delivery                                            | 0.144 (-0.046 to 0.334)                           | 0.139               |                         | 0.042 |                         |
|                                                 | Caesarean section                                            | 0.019 (-0.103 to 0.141)                           | 0.759               | 1.56                    | 0.008 | 1.82                    |
|                                                 | Maternal smoking during pregnancy                            | 0.174 (0.070 to 0.277)                            | 0.001               |                         | 0.309 |                         |
|                                                 | Maternal anxiety during pregnancy                            | -0.034 (-0.120 to 0.053)                          | 0.449               |                         | 0.015 |                         |
|                                                 | Maternal gestational weight gain (Kg/week)                   | 0.066 (-0.222 to 0.355)                           | 0.653               |                         | 0.025 |                         |
|                                                 | Air pollution exposure during pregnancy (µg/m <sup>3</sup> ) | -0.007 (-0.019 to 0.005)                          | 0.261               |                         | 0.049 |                         |
| Postnatal characteristics                       | Maternal smoking during first year of age                    | -0.096 (-0.263 to 0.071)                          | 0.261               |                         | 0.063 |                         |
|                                                 | Day care attendance during first year of age                 | 0.107 (-0.039 to 0.252)                           | 0.150               |                         | 0.084 |                         |
|                                                 | Family pet ownership during first year of age                | -0.056 (-0.142 to 0.029)                          | 0.197               |                         | 0.073 |                         |
|                                                 | Maternal anxiety during first year of age                    | 0.001 (-0.092 to 0.095)                           | 0.977               | 0.38                    | 0.002 | 1.82                    |
|                                                 | Air pollution during first year of age (µg/m <sup>3</sup> )  | -0.010 (-0.025 to 0.005)                          | 0.200               |                         | 0.059 |                         |
|                                                 | Breastfeeding during first 6 months                          | 0.085 (-0.027 to 0.196)                           | 0.137               |                         | 0.098 |                         |
|                                                 | Early second-hand smoke exposure                             | -0.001 (-0.090 to 0.088)                          | 0.978               |                         | 0.005 |                         |
| Early-Childhood characteristics                 | Second-hand smoke exposure during age 1-8 y                  | 0.018 (-0.065 to 0.101)                           | 0.669               |                         | 0.014 |                         |
|                                                 | Air pollution during 1-7 years of age (µg/m <sup>3</sup> )   | -0.008 (-0.018 to 0.002)                          | 0.098               |                         | 0.131 |                         |
|                                                 | Lean mass at age 9 years (SD-score)                          | 0.178 (0.153 to 0.203)                            | 1×10 <sup>-16</sup> | 7.93                    | 7.115 | 9.69                    |
|                                                 | Fat mass at age 9 years (SD-score)                           | -0.056 (-0.076 to -0.037)                         | 1×10 <sup>-8</sup>  |                         | 0.621 |                         |
|                                                 | Current asthma at 7.5 years                                  | 0.005 (-0.109 to 0.120)                           | 0.927               |                         | 0.014 |                         |
|                                                 | Skin Prick Test at 7.5 years                                 | 0.047 (-0.067 to 0.161)                           | 0.418               |                         | 0.035 |                         |
| Adoles.                                         | Smoking status at 14 years                                   | 0.124 (0.032 to 0.216)                            | 0.009               |                         | 0.256 |                         |
|                                                 | Age at peak height velocity in puberty (years)               | 0.014 (-0.018 to 0.047)                           | 0.387               | 0.29                    | 0.021 | 9.95                    |
|                                                 | Peak height velocity in puberty (cm/year)                    | 0.007 (-0.021 to 0.035)                           | 0.612               |                         | 0.012 |                         |

**Abbreviations:** Adoles. = adolescence characteristics; FVC = forced vital capacity; Inc. R<sup>2</sup> = incremental R<sup>2</sup> for variables in the corresponding stage; RI = relative importance (proportion of explained variation in lung function attributed to each variable – averaging over all its possible orderings among characteristics in same stage); Retained R<sup>2</sup> = Total R<sup>2</sup> for retained variables (with P-value ≤ 0.10) from previous stages and corresponding stage, Kg = kilogram; m = metre; µg = microgram; cm = centimetre.

\* Adjusted for all variables in same stage in addition to characteristics from previous stages that yield P-value ≤ 0.10.

Table S7. Adjusted association and relative importance of early-life characteristics with SD scores (adjusted for sex, age and height) of FEV<sub>1</sub> measurements (non-imputed) at age 24 years (N=2800).

| Stage                                           | Factor                                                       | Adjusted* difference in SD scores of FVC (95% CI) | P-value             | Inc. R <sup>2</sup> (%) | RI(%) | Retained R <sup>2</sup> |
|-------------------------------------------------|--------------------------------------------------------------|---------------------------------------------------|---------------------|-------------------------|-------|-------------------------|
| Demographic, maternal and child characteristics | Overcrowding                                                 | -0.088 (-0.194 to 0.019)                          | 0.108               | 1.10                    | 0.102 | 0.70                    |
|                                                 | Gas cooking                                                  | 0.027 (-0.049 to 0.102)                           | 0.485               |                         | 0.029 |                         |
|                                                 | Rented housing                                               | -0.105 (-0.250 to 0.040)                          | 0.157               |                         | 0.137 |                         |
|                                                 | Single Mother                                                | 0.088 (-0.024 to 0.200)                           | 0.122               |                         | 0.036 |                         |
|                                                 | Low maternal education                                       | -0.050 (-0.126 to 0.027)                          | 0.204               |                         | 0.084 |                         |
|                                                 | Maternal history of asthma or allergy                        | 0.020 (-0.056 to 0.097)                           | 0.605               |                         | 0.011 |                         |
|                                                 | Family financial difficulties                                | -0.222 (-0.452 to 0.008)                          | 0.058               |                         | 0.143 |                         |
|                                                 | Parity (>= 1 siblings)                                       | 0.165 (0.088 to 0.242)                            | 3×10 <sup>-5</sup>  |                         | 0.556 |                         |
| Perinatal characteristics                       | Maternal perinatal body mass index (Kg/m <sup>2</sup> )      | 0.004 (-0.007 to 0.016)                           | 0.465               | 1.12                    | 0.052 | 1.60                    |
|                                                 | Maternal age at delivery > 28 years (the median)             | 0.079 (0.001 to 0.156)                            | 0.048               |                         | 0.133 |                         |
|                                                 | Birthweight (Kg)                                             | 0.186 (0.102 to 0.270)                            | 1×10 <sup>-5</sup>  |                         | 0.771 |                         |
|                                                 | Pre-term delivery                                            | 0.041 (-0.149 to 0.232)                           | 0.671               |                         | 0.063 |                         |
|                                                 | Caesarean section                                            | -0.016 (-0.137 to 0.106)                          | 0.799               |                         | 0.006 |                         |
|                                                 | Maternal smoking during pregnancy                            | 0.084 (-0.020 to 0.188)                           | 0.115               |                         | 0.054 |                         |
|                                                 | Maternal anxiety during pregnancy                            | -0.039 (-0.126 to 0.048)                          | 0.382               |                         | 0.027 |                         |
|                                                 | Maternal gestational weight gain (Kg/week)                   | -0.047 (-0.337 to 0.242)                          | 0.749               |                         | 0.014 |                         |
|                                                 | Air pollution exposure during pregnancy (µg/m <sup>3</sup> ) | -0.002 (-0.014 to 0.011)                          | 0.801               |                         | 0.004 |                         |
| Postnatal characteristics                       | Maternal smoking during first year of age                    | -0.003 (-0.117 to 0.111)                          | 0.957               | 0.11                    | 0.003 | 1.60                    |
|                                                 | Day care attendance during first year of age                 | 0.067 (-0.077 to 0.211)                           | 0.360               |                         | 0.034 |                         |
|                                                 | Family pet ownership during first year of age                | -0.013 (-0.097 to 0.071)                          | 0.753               |                         | 0.006 |                         |
|                                                 | Maternal anxiety during first year of age                    | 0.042 (-0.053 to 0.137)                           | 0.389               |                         | 0.031 |                         |
|                                                 | Air pollution during first year of age (µg/m <sup>3</sup> )  | -0.005 (-0.020 to 0.009)                          | 0.487               |                         | 0.018 |                         |
|                                                 | Breastfeeding during first 6 months                          | 0.021 (-0.091 to 0.134)                           | 0.709               |                         | 0.010 |                         |
|                                                 | Early second-hand smoke exposure                             | 0.011 (-0.078 to 0.099)                           | 0.811               |                         | 0.003 |                         |
| Early-Childhood characteristics                 | Second-hand smoke exposure during age 1-8 y                  | 0.045 (-0.037 to 0.127)                           | 0.286               | 5.81                    | 0.057 | 7.28                    |
|                                                 | Air pollution during 1-7 years of age (µg/m <sup>3</sup> )   | -0.005 (-0.015 to 0.005)                          | 0.330               |                         | 0.047 |                         |
|                                                 | Lean mass at age 9 years (SD-score)                          | 0.150 (0.124 to 0.176)                            | 1×10 <sup>-16</sup> |                         | 4.983 |                         |
|                                                 | Fat mass at age 9 years (SD-score)                           | -0.052 (-0.071 to -0.032)                         | 2×10 <sup>-7</sup>  |                         | 0.573 |                         |
|                                                 | Current asthma at 7.5 years                                  | -0.101 (-0.220 to 0.017)                          | 0.096               |                         | 0.121 |                         |
|                                                 | Skin Prick Test at 7.5 years                                 | 0.035 (-0.083 to 0.152)                           | 0.564               |                         | 0.024 |                         |
| Adoles.                                         | Smoking status at 14 years                                   | 0.072 (-0.024 to 0.169)                           | 0.141               | 0.13                    | 0.092 | 7.28                    |
|                                                 | Age at peak height velocity in puberty (years)               | 0.018 (-0.015 to 0.050)                           | 0.286               |                         | 0.032 |                         |
|                                                 | Peak height velocity in puberty (cm/year)                    | -0.006 (-0.034 to 0.022)                          | 0.683               |                         | 0.006 |                         |

**Abbreviations:** Adoles. = adolescence characteristics; FEV<sub>1</sub> = forced expiratory volume in one second; Inc. R<sup>2</sup> = incremental R<sup>2</sup> for variables in the corresponding stage; RI = relative importance (proportion of explained variation in lung function attributed to each variable – averaging over all its possible orderings among characteristics in same stage); Retained R<sup>2</sup> = Total R<sup>2</sup> for retained variables (with P-value ≤ 0.10) from previous stages and corresponding stage, Kg = kilogram; m = metre; µg = microgram; cm = centimetre.

\* Adjusted for all variables in same stage in addition to characteristics from previous stages that yield P-value ≤ 0.10.

Table S8. Adjusted association and relative importance of early-life characteristics with SD scores (adjusted for sex, age and height) of FEV<sub>1</sub>/FVC measurements (non-imputed) at age 24 years (N=2800).

| Stage                                           | Factor                                                       | Adjusted* difference in SD scores of FVC (95% CI) | P-value            | Inc. R <sup>2</sup> (%) | RI(%) | Retained R <sup>2</sup> |
|-------------------------------------------------|--------------------------------------------------------------|---------------------------------------------------|--------------------|-------------------------|-------|-------------------------|
| Demographic, maternal and child characteristics | Overcrowding                                                 | -0.017 (-0.125 to 0.091)                          | 0.755              | 0.46                    | 0.015 | 0.33                    |
|                                                 | Gas cooking                                                  | 0.006 (-0.071 to 0.083)                           | 0.883              |                         | 0.005 |                         |
|                                                 | Rented housing                                               | -0.047 (-0.187 to 0.092)                          | 0.504              |                         | 0.046 |                         |
|                                                 | Single Mother                                                | 0.007 (-0.105 to 0.118)                           | 0.908              |                         | 0.008 |                         |
|                                                 | Low maternal education                                       | -0.080 (-0.157 to -0.004)                         | 0.040              |                         | 0.173 |                         |
|                                                 | Maternal history of asthma or allergy                        | -0.018 (-0.094 to 0.058)                          | 0.642              |                         | 0.008 |                         |
|                                                 | Family financial difficulties                                | -0.228 (-0.460 to 0.003)                          | 0.053              |                         | 0.159 |                         |
|                                                 | Parity (>= 1 siblings)                                       | 0.047 (-0.030 to 0.124)                           | 0.232              |                         | 0.046 |                         |
| Perinatal characteristics                       | Maternal perinatal body mass index (Kg/m <sup>2</sup> )      | -0.019 (-0.030 to -0.008)                         | 0.001              | 1.23                    | 0.396 | 1.31                    |
|                                                 | Maternal age at delivery > 28 years (the median)             | -0.006 (-0.085 to 0.072)                          | 0.875              |                         | 0.001 |                         |
|                                                 | Birthweight (Kg)                                             | 0.026 (-0.057 to 0.110)                           | 0.538              |                         | 0.056 |                         |
|                                                 | Pre-term delivery                                            | -0.220 (-0.411 to -0.029)                         | 0.024              |                         | 0.238 |                         |
|                                                 | Caesarean section                                            | -0.077 (-0.199 to 0.044)                          | 0.210              |                         | 0.090 |                         |
|                                                 | Maternal smoking during pregnancy                            | -0.161 (-0.269 to -0.053)                         | 0.003              |                         | 0.340 |                         |
|                                                 | Maternal anxiety during pregnancy                            | -0.007 (-0.097 to 0.083)                          | 0.879              |                         | 0.015 |                         |
|                                                 | Maternal gestational weight gain (Kg/week)                   | -0.182 (-0.470 to 0.106)                          | 0.215              |                         | 0.032 |                         |
|                                                 | Air pollution exposure during pregnancy (µg/m <sup>3</sup> ) | 0.007 (-0.005 to 0.020)                           | 0.248              |                         | 0.057 |                         |
| Postnatal characteristics                       | Maternal smoking during first year of age                    | -0.056 (-0.228 to 0.116)                          | 0.523              | 0.22                    | 0.020 | 1.31                    |
|                                                 | Day care attendance during first year of age                 | -0.059 (-0.204 to 0.087)                          | 0.429              |                         | 0.025 |                         |
|                                                 | Family pet ownership during first year of age                | 0.042 (-0.041 to 0.125)                           | 0.318              |                         | 0.039 |                         |
|                                                 | Maternal anxiety during first year of age                    | 0.060 (-0.037 to 0.156)                           | 0.225              |                         | 0.058 |                         |
|                                                 | Air pollution during first year of age (µg/m <sup>3</sup> )  | 0.002 (-0.013 to 0.017)                           | 0.803              |                         | 0.003 |                         |
|                                                 | Breastfeeding during first 6 months                          | -0.076 (-0.189 to 0.037)                          | 0.189              |                         | 0.071 |                         |
|                                                 | Early second-hand smoke exposure                             | -0.004 (-0.094 to 0.086)                          | 0.934              |                         | 0.002 |                         |
| Early-Childhood characteristics                 | Second-hand smoke exposure during age 1-8 y                  | -0.004 (-0.090 to 0.083)                          | 0.930              | 1.34                    | 0.006 | 2.55                    |
|                                                 | Air pollution during 1-7 years of age (µg/m <sup>3</sup> )   | 0.004 (-0.006 to 0.014)                           | 0.437              |                         | 0.028 |                         |
|                                                 | Lean mass at age 9 years (SD-score)                          | -0.052 (-0.078 to -0.025)                         | 1×10 <sup>-4</sup> |                         | 0.707 |                         |
|                                                 | Fat mass at age 9 years (SD-score)                           | 0.001 (-0.021 to 0.023)                           | 0.939              |                         | 0.041 |                         |
|                                                 | Current asthma at 7.5 years                                  | -0.199 (-0.325 to -0.072)                         | 0.003              |                         | 0.536 |                         |
|                                                 | Skin Prick Test at 7.5 years                                 | 0.007 (-0.101 to 0.114)                           | 0.904              |                         | 0.026 |                         |
| Adoles.                                         | Smoking status at 14 years                                   | -0.087 (-0.194 to 0.019)                          | 0.109              | 0.22                    | 0.151 | 2.55                    |
|                                                 | Age at peak height velocity in puberty (years)               | 0.013 (-0.020 to 0.045)                           | 0.453              |                         | 0.024 |                         |
|                                                 | Peak height velocity in puberty (cm/year)                    | -0.018 (-0.047 to 0.010)                          | 0.210              |                         | 0.049 |                         |

**Abbreviations:** Adoles. = adolescence characteristics; FEV<sub>1</sub> = forced expiratory volume in one second; FVC = forced vital capacity ; Inc. R<sup>2</sup> = incremental R<sup>2</sup> for variables in the corresponding stage; RI = relative importance (proportion of explained variation in lung function attributed to each variable – averaging over all its possible orderings among characteristics in same stage); Retained R<sup>2</sup> = Total R<sup>2</sup> for retained variables from previous stages and corresponding stage, Kg = kilogram; m = metre; µg = microgram; cm = centimetre.

\* Adjusted for all variables in same stage in addition to characteristics from previous stages that yield P-value ≤ 0.10.

Table S9. Adjusted association and relative importance of early-life characteristics with SD scores (adjusted for sex, age and height) of FEF<sub>25-75</sub> measurements (non-imputed) at age 24 years (N=2800).

| Stage                                           | Factor                                                       | Adjusted* difference in SD scores of FVC (95% CI) | P-value            | Inc. R <sup>2</sup> (%) | RI(%) | Retained R <sup>2</sup> |
|-------------------------------------------------|--------------------------------------------------------------|---------------------------------------------------|--------------------|-------------------------|-------|-------------------------|
| Demographic, maternal and child characteristics | Overcrowding                                                 | -0.016 (-0.124 to 0.093)                          | 0.775              | 0.59                    | 0.009 | 0.41                    |
|                                                 | Gas cooking                                                  | 0.020 (-0.056 to 0.097)                           | 0.607              |                         | 0.016 |                         |
|                                                 | Rented housing                                               | -0.048 (-0.190 to 0.094)                          | 0.508              |                         | 0.042 |                         |
|                                                 | Single Mother                                                | 0.031 (-0.081 to 0.143)                           | 0.589              |                         | 0.007 |                         |
|                                                 | Low maternal education                                       | -0.059 (-0.137 to 0.018)                          | 0.131              |                         | 0.099 |                         |
|                                                 | Maternal history of asthma or allergy                        | -0.006 (-0.083 to 0.071)                          | 0.879              |                         | 0.003 |                         |
|                                                 | Family financial difficulties                                | -0.267 (-0.497 to -0.037)                         | 0.023              |                         | 0.199 |                         |
|                                                 | Parity (>= 1 siblings)                                       | 0.099 (0.022 to 0.176)                            | 0.012              |                         | 0.212 |                         |
| Perinatal characteristics                       | Maternal perinatal body mass index (Kg/m <sup>2</sup> )      | 0.000 (-0.012 to 0.011)                           | 0.959              | 0.87                    | 0.004 | 1.02                    |
|                                                 | Maternal age at delivery > 28 years (the median)             | 0.038 (-0.040 to 0.116)                           | 0.342              |                         | 0.039 |                         |
|                                                 | Birthweight (Kg)                                             | 0.089 (0.005 to 0.173)                            | 0.039              |                         | 0.309 |                         |
|                                                 | Pre-term delivery                                            | -0.206 (-0.397 to -0.015)                         | 0.034              |                         | 0.296 |                         |
|                                                 | Caesarean section                                            | -0.073 (-0.194 to 0.048)                          | 0.239              |                         | 0.065 |                         |
|                                                 | Maternal smoking during pregnancy                            | -0.081 (-0.186 to 0.024)                          | 0.132              |                         | 0.105 |                         |
|                                                 | Maternal anxiety during pregnancy                            | 0.014 (-0.074 to 0.103)                           | 0.749              |                         | 0.006 |                         |
|                                                 | Maternal gestational weight gain (Kg/week)                   | -0.139 (-0.428 to 0.150)                          | 0.347              |                         | 0.021 |                         |
|                                                 | Air pollution exposure during pregnancy (µg/m <sup>3</sup> ) | 0.005 (-0.008 to 0.017)                           | 0.441              |                         | 0.027 |                         |
| Postnatal characteristics                       | Maternal smoking during first year of age                    | -0.136 (-0.304 to 0.032)                          | 0.112              | 0.25                    | 0.099 | 1.02                    |
|                                                 | Day care attendance during first year of age                 | 0.038 (-0.107 to 0.183)                           | 0.606              |                         | 0.012 |                         |
|                                                 | Family pet ownership during first year of age                | 0.051 (-0.032 to 0.134)                           | 0.231              |                         | 0.054 |                         |
|                                                 | Maternal anxiety during first year of age                    | 0.052 (-0.046 to 0.151)                           | 0.298              |                         | 0.046 |                         |
|                                                 | Air pollution during first year of age (µg/m <sup>3</sup> )  | 0.001 (-0.014 to 0.016)                           | 0.900              |                         | 0.002 |                         |
|                                                 | Breastfeeding during first 6 months                          | -0.051 (-0.163 to 0.061)                          | 0.373              |                         | 0.034 |                         |
|                                                 | Early second-hand smoke exposure                             | -0.004 (-0.093 to 0.085)                          | 0.930              |                         | 0.002 |                         |
| Early-Childhood characteristics                 | Second-hand smoke exposure during age 1-8 y                  | -0.020 (-0.107 to 0.067)                          | 0.650              | 1.30                    | 0.014 | 2.24                    |
|                                                 | Air pollution during 1-7 years of age (µg/m <sup>3</sup> )   | 0.002 (-0.008 to 0.012)                           | 0.690              |                         | 0.007 |                         |
|                                                 | Lean mass at age 9 years (SD-score)                          | 0.047 (0.020 to 0.073)                            | 0.001              |                         | 0.509 |                         |
|                                                 | Fat mass at age 9 years (SD-score)                           | -0.008 (-0.029 to 0.013)                          | 0.448              |                         | 0.024 |                         |
|                                                 | Current asthma at 7.5 years                                  | -0.243 (-0.362 to -0.124)                         | 8×10 <sup>-5</sup> |                         | 0.716 |                         |
|                                                 | Skin Prick Test at 7.5 years                                 | 0.053 (-0.051 to 0.158)                           | 0.319              |                         | 0.029 |                         |
| Adoles                                          | Smoking status at 14 years                                   | -0.047 (-0.151 to 0.057)                          | 0.381              | 0.09                    | 0.051 | 2.24                    |
|                                                 | Age at peak height velocity in puberty (years)               | 0.013 (-0.020 to 0.046)                           | 0.437              |                         | 0.024 |                         |
|                                                 | Peak height velocity in puberty (cm/year)                    | -0.009 (-0.037 to 0.019)                          | 0.535              |                         | 0.012 |                         |

**Abbreviations:** Adoles. = adolescence characteristics; FEF<sub>25-75</sub> = forced expiratory flow, midexpiratory phase; Inc. R<sup>2</sup> = incremental R<sup>2</sup> for variables in the corresponding stage; RI = relative importance (proportion of explained variation in lung function attributed to each variable – averaging over all its possible orderings among characteristics in same stage); Retained R<sup>2</sup> = Total R<sup>2</sup> for retained variables (with P-value ≤ 0.10) from previous stages and corresponding stage, Kg = kilogram; m = metre; µg = microgram; cm = centimetre

\* Adjusted for all variables in same stage in addition to characteristics from previous stages that yield P-value ≤ 0.10.

Table S10. Crude associations of early-life characteristics with SD scores of FVC (scores adjusted for sex, age and height) at age 24 years (N=7545).

| Stage                                           | Factor                                                       | Difference in SD scores of FVC (95% CI) | P-value |
|-------------------------------------------------|--------------------------------------------------------------|-----------------------------------------|---------|
| Demographic, maternal and child characteristics | Overcrowding                                                 | -0.034 (-0.114 to 0.046)                | 0.402   |
|                                                 | Gas cooking                                                  | -0.009 (-0.077 to 0.060)                | 0.806   |
|                                                 | Rented housing                                               | -0.019 (-0.144 to 0.105)                | 0.762   |
|                                                 | Single Mother                                                | 0.012 (-0.069 to 0.094)                 | 0.769   |
|                                                 | Low maternal education*                                      | -0.024 (-0.083 to 0.034)                | 0.417   |
|                                                 | Maternal history of asthma or allergy                        | 0.027 (-0.041 to 0.095)                 | 0.442   |
|                                                 | Family financial difficulties                                | -0.127 (-0.377 to 0.123)                | 0.326   |
|                                                 | Parity (>= 1 siblings)                                       | 0.102 (-0.033 to 0.170)                 | 0.005   |
| Perinatal characteristics                       | Maternal perinatal body mass index (Kg/m <sup>2</sup> )      | 0.023 (-0.012 to 0.033)                 | 0.000   |
|                                                 | Maternal age at delivery > 28 years (the median)             | 0.073 (-0.004 to 0.141)                 | 0.043   |
|                                                 | Birthweight (Kg)                                             | 0.146 (-0.083 to 0.208)                 | 0.000   |
|                                                 | Pre-term delivery                                            | -0.025 (-0.198 to 0.148)                | 0.778   |
|                                                 | Caesarean section                                            | 0.020 (-0.103 to 0.142)                 | 0.754   |
|                                                 | Maternal smoking during pregnancy                            | 0.136 (-0.032 to 0.240)                 | 0.015   |
|                                                 | Maternal anxiety during pregnancy                            | -0.011 (-0.093 to 0.070)                | 0.786   |
|                                                 | Maternal gestational weight gain (Kg/week)                   | 0.040 (-0.199 to 0.280)                 | 0.743   |
|                                                 | Air pollution exposure during pregnancy (µg/m <sup>3</sup> ) | -0.009 (-0.021 to 0.002)                | 0.111   |
| Postnatal characteristics                       | Maternal smoking during first year of age                    | 0.065 (-0.038 to 0.168)                 | 0.225   |
|                                                 | Day care attendance during first year of age                 | 0.074 (-0.058 to 0.206)                 | 0.277   |
|                                                 | Family pet ownership during first year of age                | -0.025 (-0.092 to 0.041)                | 0.456   |
|                                                 | Maternal anxiety during first year of age                    | 0.049 (-0.041 to 0.139)                 | 0.291   |
|                                                 | Air pollution during first year of age (µg/m <sup>3</sup> )  | -0.010 (-0.022 to 0.003)                | 0.147   |
|                                                 | Breastfeeding during first 6 months                          | 0.002 (-0.095 to 0.099)                 | 0.969   |
|                                                 | Early second-hand smoke exposure                             | 0.045 (-0.026 to 0.117)                 | 0.220   |
| Early-Childhood characteristics                 | Second-hand smoke exposure during age 1-8 y                  | 0.050 (-0.011 to 0.111)                 | 0.109   |
|                                                 | Air pollution during 1-7 years of age (µg/m <sup>3</sup> )   | -0.011 (-0.020 to -0.002)               | 0.017   |
|                                                 | Lean mass at age 9 years (kg) †                              | 0.169 (-0.151 to 0.188)                 | 0.000   |
|                                                 | Fat mass at age 9 years (kg/2) †                             | 0.007 (-0.012 to 0.025)                 | 0.475   |
|                                                 | Current asthma at 7.5 years                                  | 0.092 (-0.029 to 0.214)                 | 0.145   |
|                                                 | Skin Prick Test at 7.5 years                                 | 0.008 (-0.089 to 0.105)                 | 0.874   |
| Adoles.                                         | Smoking status at 14 years                                   | 0.163 (-0.067 to 0.258)                 | 0.002   |
|                                                 | Age at peak height velocity in puberty (years)               | -0.013 (-0.035 to 0.009)                | 0.248   |
|                                                 | Peak height velocity in puberty (cm/year)                    | 0.011 (-0.010 to 0.033)                 | 0.290   |

Abbreviations: FVC = forced vital capacity; Adoles. = adolescence; Kg = kilogram; m = metre; µg = microgram; cm = centimetre.

\*Educated to the General Certificate of Education level (school-leaving certificate) or lower, see **Error! Reference source not found..**

Table S11. Crude associations of early-life characteristics with SD scores of FEV<sub>1</sub> (scores adjusted for sex, age and height) at age 24 years (N=7545).

| Stage                                           | Factor                                                       | Difference in SD scores of FEV <sub>1</sub> (95% CI) | P-value |
|-------------------------------------------------|--------------------------------------------------------------|------------------------------------------------------|---------|
| Demographic, maternal and child characteristics | Overcrowding                                                 | -0.074 (-0.157 to 0.009)                             | 0.084   |
|                                                 | Gas cooking                                                  | -0.008 (-0.076 to 0.061)                             | 0.828   |
|                                                 | Rented housing                                               | -0.103 (-0.235 to 0.029)                             | 0.136   |
|                                                 | Single Mother                                                | -0.018 (-0.108 to 0.072)                             | 0.695   |
|                                                 | Low maternal education*                                      | -0.081 (-0.147 to -0.016)                            | 0.018   |
|                                                 | Maternal history of asthma or allergy                        | 0.021 (-0.050 to 0.092)                              | 0.564   |
|                                                 | Family financial difficulties                                | -0.252 (-0.461 to -0.042)                            | 0.023   |
|                                                 | Parity (>= 1 siblings)                                       | 0.130 ( 0.060 to 0.200)                              | 0.001   |
| Perinatal characteristics                       | Maternal perinatal body mass index (Kg/m <sup>2</sup> )      | 0.009 ( 0.000 to 0.018)                              | 0.068   |
|                                                 | Maternal age at delivery > 28 years (the median)             | 0.111 ( 0.051 to 0.171)                              | 0.000   |
|                                                 | Birthweight (Kg)                                             | 0.162 ( 0.103 to 0.221)                              | 0.000   |
|                                                 | Pre-term delivery                                            | -0.169 (-0.324 to -0.014)                            | 0.037   |
|                                                 | Caesarean section                                            | -0.043 (-0.161 to 0.075)                             | 0.479   |
|                                                 | Maternal smoking during pregnancy                            | 0.008 (-0.102 to 0.119)                              | 0.881   |
|                                                 | Maternal anxiety during pregnancy                            | -0.039 (-0.129 to 0.052)                             | 0.408   |
|                                                 | Maternal gestational weight gain (Kg/week)                   | -0.004 (-0.239 to 0.231)                             | 0.971   |
|                                                 | Air pollution exposure during pregnancy (µg/m <sup>3</sup> ) | -0.006 (-0.016 to 0.005)                             | 0.299   |
| Postnatal characteristics                       | Maternal smoking during first year of age                    | -0.055 (-0.157 to 0.048)                             | 0.303   |
|                                                 | Day care attendance during first year of age                 | 0.075 (-0.072 to 0.223)                              | 0.322   |
|                                                 | Family pet ownership during first year of age                | -0.031 (-0.098 to 0.037)                             | 0.379   |
|                                                 | Maternal anxiety during first year of age                    | 0.047 (-0.033 to 0.126)                              | 0.253   |
|                                                 | Air pollution during first year of age (µg/m <sup>3</sup> )  | -0.009 (-0.021 to 0.004)                             | 0.169   |
|                                                 | Breastfeeding during first 6 months                          | -0.006 (-0.108 to 0.096)                             | 0.907   |
|                                                 | Early second-hand smoke exposure                             | -0.023 (-0.104 to 0.059)                             | 0.588   |
| Early-Childhood characteristics                 | Second-hand smoke exposure during age 1-8 y                  | -0.025 (-0.089 to 0.040)                             | 0.458   |
|                                                 | Air pollution during 1-7 years of age (µg/m <sup>3</sup> )   | -0.009 (-0.019 to 0.001)                             | 0.074   |
|                                                 | Lean mass at age 9 years (kg) †                              | 0.124 ( 0.105 to 0.144)                              | 0.000   |
|                                                 | Fat mass at age 9 years (kg/2) †                             | -0.009 (-0.025 to 0.007)                             | 0.277   |
|                                                 | Current asthma at 7.5 years                                  | -0.064 (-0.162 to 0.033)                             | 0.203   |
|                                                 | Skin Prick Test at 7.5 years                                 | -0.001 (-0.103 to 0.100)                             | 0.977   |
| Adoles.                                         | Smoking status at 14 years                                   | 0.094 ( 0.008 to 0.181)                              | 0.038   |
|                                                 | Age at peak height velocity in puberty (years)               | 0.003 (-0.021 to 0.027)                              | 0.800   |
|                                                 | Peak height velocity in puberty (cm/year)                    | 0.000 (-0.022 to 0.022)                              | 0.998   |

Abbreviations: FEV<sub>1</sub> = forced expiratory volume in one second; Adoles. = adolescence; Kg = kilogram; m = metre; µg = microgram; cm = centimetre.

\*Educated to the General Certificate of Education level (school-leaving certificate) or lower, see **Error! Reference source not found..**

Table S12. Crude associations of early-life characteristics with SD scores of FEV<sub>1</sub>/FVC (scores adjusted for sex, age and height) at age 24 years (N=7545).

| Stage                                           | Factor                                                       | Difference in SD scores of FEV <sub>1</sub> /FVC (95% CI) | P-value |
|-------------------------------------------------|--------------------------------------------------------------|-----------------------------------------------------------|---------|
| Demographic, maternal and child characteristics | Overcrowding                                                 | -0.068 (-0.164 to 0.029)                                  | 0.175   |
|                                                 | Gas cooking                                                  | -0.001 (-0.078 to 0.076)                                  | 0.978   |
|                                                 | Rented housing                                               | -0.140 (-0.248 to -0.031)                                 | 0.015   |
|                                                 | Single Mother                                                | -0.052 (-0.153 to 0.049)                                  | 0.323   |
|                                                 | Low maternal education*                                      | -0.095 (-0.156 to -0.034)                                 | 0.003   |
|                                                 | Maternal history of asthma or allergy                        | -0.006 (-0.075 to 0.064)                                  | 0.873   |
|                                                 | Family financial difficulties                                | -0.226 (-0.408 to -0.044)                                 | 0.018   |
|                                                 | Parity (>= 1 siblings)                                       | 0.051 (-0.019 to 0.121)                                   | 0.157   |
| Perinatal characteristics                       | Maternal perinatal body mass index (Kg/m <sup>2</sup> )      | -0.020 (-0.030 to -0.010)                                 | 0.000   |
|                                                 | Maternal age at delivery > 28 years (the median)             | 0.068 (-0.004 to 0.140)                                   | 0.069   |
|                                                 | Birthweight (Kg)                                             | 0.037 (-0.031 to 0.106)                                   | 0.291   |
|                                                 | Pre-term delivery                                            | -0.250 (-0.404 to -0.096)                                 | 0.002   |
|                                                 | Caesarean section                                            | -0.104 (-0.222 to 0.014)                                  | 0.089   |
|                                                 | Maternal smoking during pregnancy                            | -0.198 (-0.296 to -0.100)                                 | 0.000   |
|                                                 | Maternal anxiety during pregnancy                            | -0.042 (-0.137 to 0.053)                                  | 0.397   |
|                                                 | Maternal gestational weight gain (Kg/week)                   | -0.067 (-0.305 to 0.172)                                  | 0.587   |
|                                                 | Air pollution exposure during pregnancy (µg/m <sup>3</sup> ) | 0.005 (-0.006 to 0.016)                                   | 0.404   |
| Postnatal characteristics                       | Maternal smoking during first year of age                    | -0.189 (-0.298 to -0.081)                                 | 0.002   |
|                                                 | Day care attendance during first year of age                 | 0.009 (-0.130 to 0.149)                                   | 0.897   |
|                                                 | Family pet ownership during first year of age                | -0.013 (-0.079 to 0.054)                                  | 0.703   |
|                                                 | Maternal anxiety during first year of age                    | -0.005 (-0.077 to 0.066)                                  | 0.880   |
|                                                 | Air pollution during first year of age (µg/m <sup>3</sup> )  | 0.000 (-0.015 to 0.015)                                   | 0.973   |
|                                                 | Breastfeeding during first 6 months                          | -0.007 (-0.127 to 0.114)                                  | 0.911   |
|                                                 | Early second-hand smoke exposure                             | -0.106 (-0.183 to -0.029)                                 | 0.010   |
| Early-Childhood characteristics                 | Second-hand smoke exposure during age 1-8 y                  | -0.118 (-0.182 to -0.054)                                 | 0.001   |
|                                                 | Air pollution during 1-7 years of age (µg/m <sup>3</sup> )   | 0.002 (-0.007 to 0.012)                                   | 0.640   |
|                                                 | Lean mass at age 9 years (kg) †                              | -0.063 (-0.084 to -0.042)                                 | 0.000   |
|                                                 | Fat mass at age 9 years (kg/2) †                             | -0.027 (-0.046 to -0.008)                                 | 0.009   |
|                                                 | Current asthma at 7.5 years                                  | -0.238 (-0.349 to -0.127)                                 | 0.000   |
|                                                 | Skin Prick Test at 7.5 years                                 | -0.003 (-0.097 to 0.091)                                  | 0.952   |
| Adoles.                                         | Smoking status at 14 years                                   | -0.101 (-0.188 to -0.014)                                 | 0.027   |
|                                                 | Age at peak height velocity in puberty (years)               | 0.024 ( 0.002 to 0.046)                                   | 0.031   |
|                                                 | Peak height velocity in puberty (cm/year)                    | -0.016 (-0.035 to 0.004)                                  | 0.115   |

Abbreviations: FEV1 = forced expiratory volume in one second; FVC = forced vital capacity; Adoles. = adolescence; Kg = kilogram; m = metre; µg = microgram; cm = centimetre.

\*Educated to the General Certificate of Education level (school-leaving certificate) or lower, see **Error! Reference source not found..**

Table S13. Crude associations of early-life characteristics with SD scores of FEF<sub>25-75</sub> (scores adjusted for sex, age and height) at age 24 years (N=7545).

| Stage                                           | Factor                                                       | Difference in SD scores of FEF <sub>25-75</sub> (95% CI) | P-value |
|-------------------------------------------------|--------------------------------------------------------------|----------------------------------------------------------|---------|
| Demographic, maternal and child characteristics | Overcrowding                                                 | -0.045 (-0.143 to 0.054)                                 | 0.378   |
|                                                 | Gas cooking                                                  | -0.010 (-0.087 to 0.067)                                 | 0.802   |
|                                                 | Rented housing                                               | -0.102 (-0.201 to -0.003)                                | 0.049   |
|                                                 | Single Mother                                                | -0.052 (-0.146 to 0.043)                                 | 0.290   |
|                                                 | Low maternal education*                                      | -0.084 (-0.143 to -0.026)                                | 0.006   |
|                                                 | Maternal history of asthma or allergy                        | 0.007 (-0.061 to 0.076)                                  | 0.834   |
|                                                 | Family financial difficulties                                | -0.252 (-0.424 to -0.079)                                | 0.005   |
|                                                 | Parity (>= 1 siblings)                                       | 0.090 ( 0.020 to 0.160)                                  | 0.014   |
| Perinatal characteristics                       | Maternal perinatal body mass index (Kg/m <sup>2</sup> )      | 0.001 (-0.009 to 0.011)                                  | 0.843   |
|                                                 | Maternal age at delivery > 28 years (the median)             | 0.097 ( 0.031 to 0.163)                                  | 0.005   |
|                                                 | Birthweight (Kg)                                             | 0.112 ( 0.056 to 0.168)                                  | 0.000   |
|                                                 | Pre-term delivery                                            | -0.302 (-0.470 to -0.135)                                | 0.001   |
|                                                 | Caesarean section                                            | -0.102 (-0.215 to 0.012)                                 | 0.085   |
|                                                 | Maternal smoking during pregnancy                            | -0.123 (-0.237 to -0.008)                                | 0.044   |
|                                                 | Maternal anxiety during pregnancy                            | -0.010 (-0.101 to 0.081)                                 | 0.825   |
|                                                 | Maternal gestational weight gain (Kg/week)                   | -0.086 (-0.332 to 0.161)                                 | 0.499   |
|                                                 | Air pollution exposure during pregnancy (µg/m <sup>3</sup> ) | -0.001 (-0.012 to 0.010)                                 | 0.858   |
| Postnatal characteristics                       | Maternal smoking during first year of age                    | -0.160 (-0.271 to -0.048)                                | 0.008   |
|                                                 | Day care attendance during first year of age                 | 0.068 (-0.060 to 0.195)                                  | 0.301   |
|                                                 | Family pet ownership during first year of age                | 0.001 (-0.067 to 0.068)                                  | 0.982   |
|                                                 | Maternal anxiety during first year of age                    | 0.006 (-0.065 to 0.078)                                  | 0.866   |
|                                                 | Air pollution during first year of age (µg/m <sup>3</sup> )  | -0.005 (-0.018 to 0.008)                                 | 0.434   |
|                                                 | Breastfeeding during first 6 months                          | -0.035 (-0.152 to 0.081)                                 | 0.553   |
|                                                 | Early second-hand smoke exposure                             | -0.069 (-0.151 to 0.013)                                 | 0.108   |
| Early-Childhood characteristics                 | Second-hand smoke exposure during age 1-8 y                  | -0.103 (-0.171 to -0.035)                                | 0.004   |
|                                                 | Air pollution during 1-7 years of age (µg/m <sup>3</sup> )   | -0.003 (-0.013 to 0.006)                                 | 0.472   |
|                                                 | Lean mass at age 9 years (kg) †                              | 0.031 ( 0.010 to 0.052)                                  | 0.007   |
|                                                 | Fat mass at age 9 years (kg/2) †                             | -0.002 (-0.020 to 0.016)                                 | 0.798   |
|                                                 | Current asthma at 7.5 years                                  | -0.229 (-0.317 to -0.142)                                | 0.000   |
|                                                 | Skin Prick Test at 7.5 years                                 | 0.003 (-0.099 to 0.105)                                  | 0.955   |
| Adoles.                                         | Smoking status at 14 years                                   | -0.048 (-0.131 to 0.035)                                 | 0.262   |
|                                                 | Age at peak height velocity in puberty (years)               | 0.007 (-0.015 to 0.029)                                  | 0.545   |
|                                                 | Peak height velocity in puberty (cm/year)                    | -0.011 (-0.031 to 0.009)                                 | 0.293   |

Abbreviations: FEF<sub>25-75</sub> = forced expiratory flow, midexpiratory phase; Adoles. = adolescence; Kg = kilogram; m = metre; µg = microgram; cm = centimetre.

\*Educated to the General Certificate of Education level (school-leaving certificate) or lower, see **Error! Reference source not found..**

FIGURES

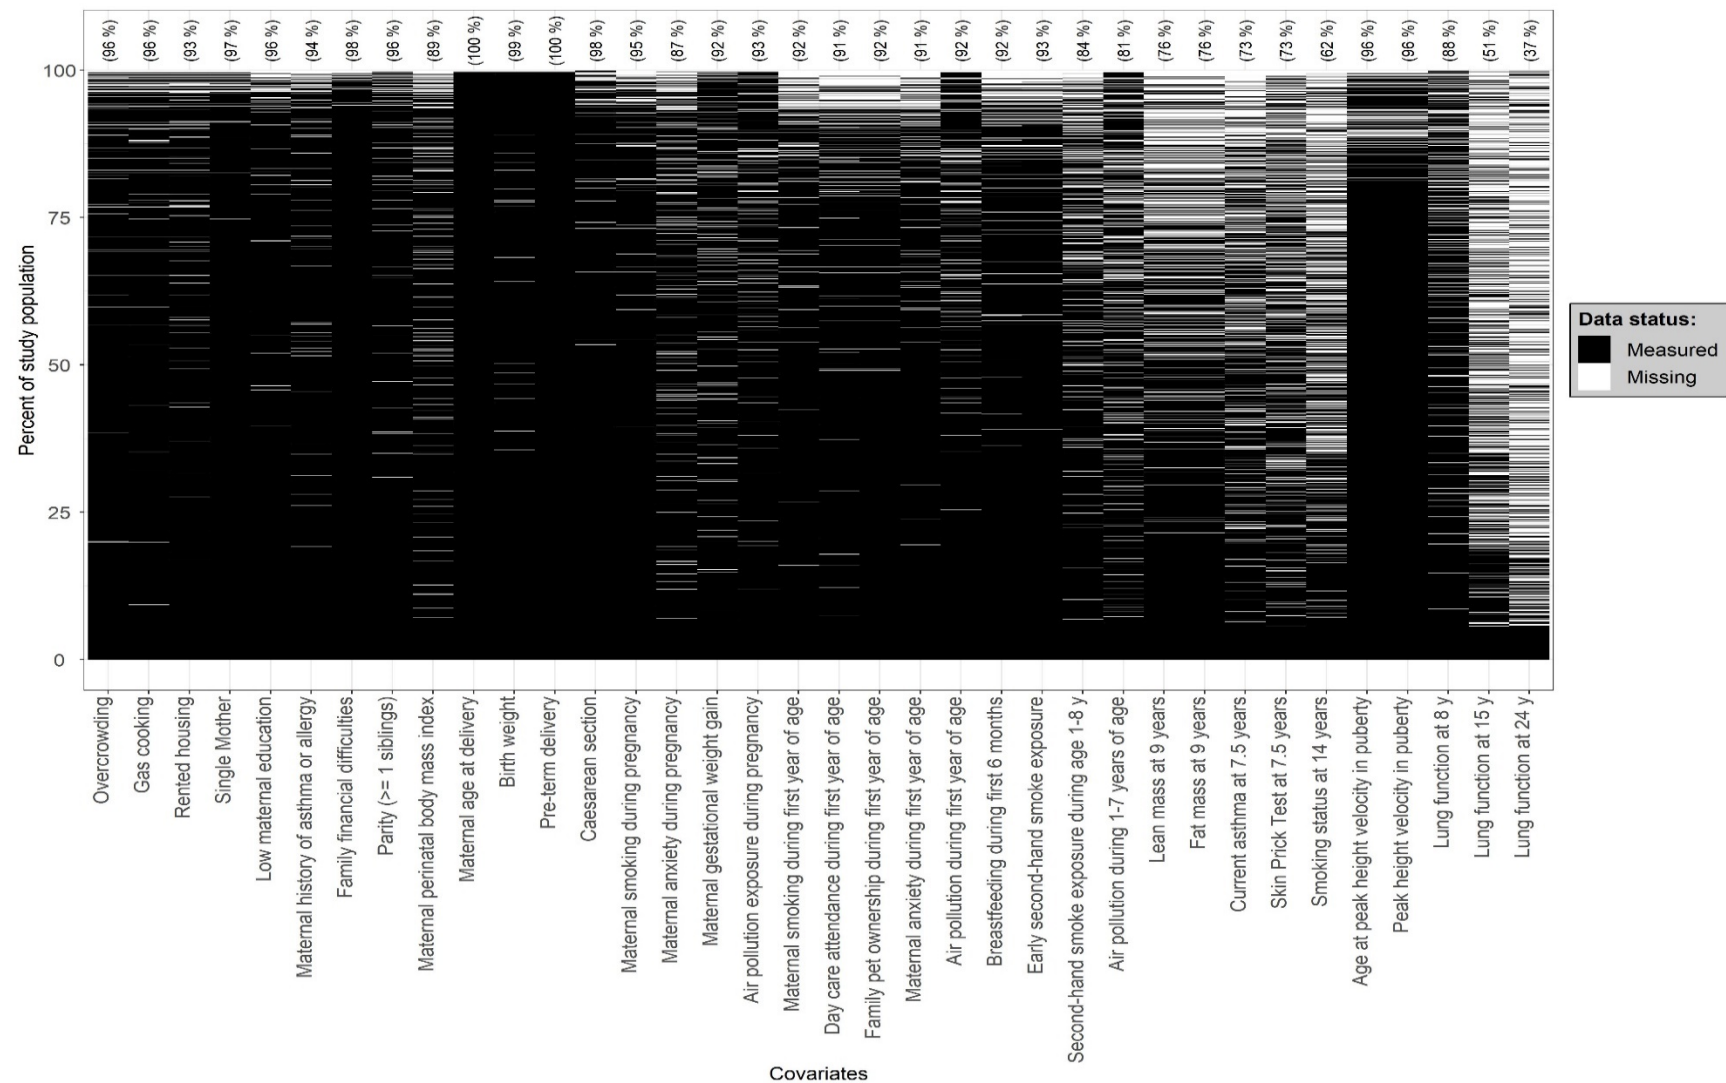

Figure S1. Layout of missing data among study population (N=7,545), with percent of observed data shown above corresponding characteristic's column

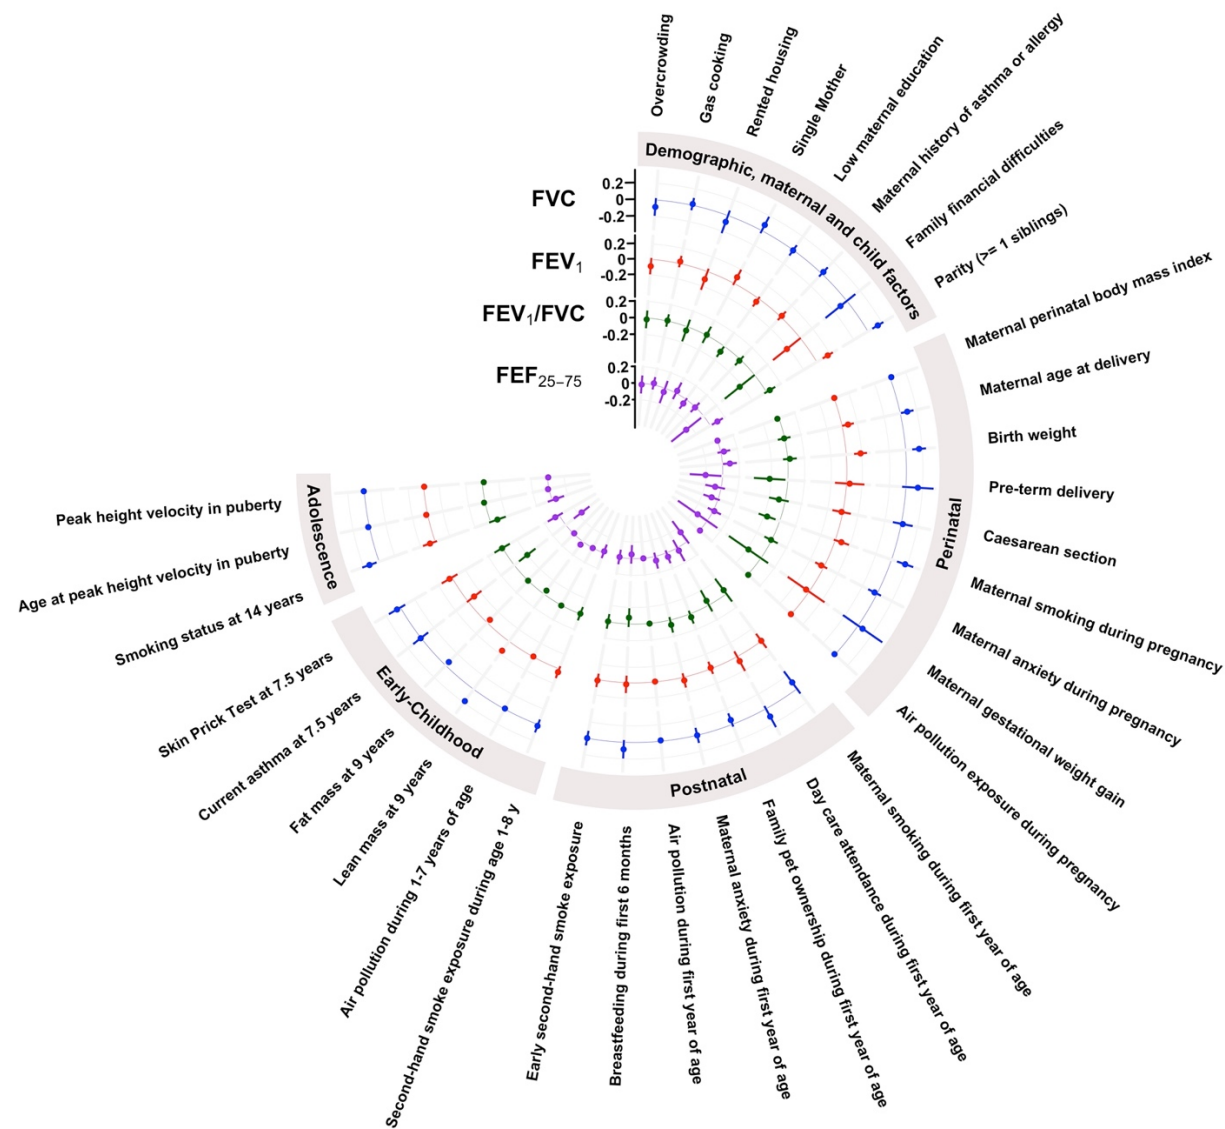

Figure S2. Circular plot of characteristics' association (point estimates and 95% confidence intervals) with measured (non-imputed) lung function parameters at age 24 years (N=2800). The raw data used for generating this plot are reported in Tables S6-S9.
